# Supplementary material for: Comparative analysis of mammalian Y chromosomes illuminates ancestral structure and lineage-specific evolution
Source: HighWire-hosted journal article supplement (doi:10.1101/gr.154286.112), 2013-06-20
Supplement: Supplemental_TableS4.xlsx [file Supplemental_TableS4.xlsx]

## Sheet: Sheet1
Supplementary Table 4: Selected results of RNAz prediction. The table shows only those predicted RNAs which have been found in at least 3 species.
number	start location on human Y chromosome	length	orientation	Regional information based on human Y chromosome sequence	Related species	Supporting data for potential regulatory function (UCSC browser)
1	2714941	120	+	RPS4Y1 intron	H/CH/C	ENCODE RNA-seq; Open Chromatin TFBS by ChIP-seq; ENCODE RNA-seq; Transcription Factor Binding Sites by ChIP-seq; Open Chromatin TFBS by ChIP-seq
2	2717390	111	+	RPS4Y1 intron	H/CH/D	ENCODE RNA-seq
3	2718403	117	-	RPS4Y1 intron	H/CH/C	ENCODE RNA-seq; Open Chromatin TFBS by ChIP-seq
4	2720097	99	-	RPS4Y1 intron	H/CH/C	ENCODE RNA-seq; human ESTs; Open Chromatin TFBS by ChIP-seq
5	2734298	101	+	RPS4Y1 intron	H/CH/C	ENCODE RNA-seq; human ESTs; Microarrays
6	2734573	91	+	RPS4Y1 intron	H/CH/C	ENCODE RNA-seq; human ESTs
7	2751712	115	+	intergenic	H/CH/D/Ca	DNaseI/FAIRE/ChIP Synthesis from ENCODE/OpenChrom
8	2764893	120	+	intergenic	H/CH/C
9	2803602	101	-	ZFY 5UTR	H/CH/D/C	H3K27Ac Mark; ENCODE RNA-seq
10	2804115	119	-	ZFY intron	H/CH/C	ENCODE RNA-seq; Transcription Factor Binding Sites by ChIP-seq; Microarrays; Open Chromatin TFBS;
11	2826411	116	+	ZFY intron	H/CH/D
12	6732720	110	+	intergenic	H/CH/C	Open Chromatin TFBS by ChIP-seq;
13	6733113	97	-	intergenic	H/CH/C	ChIP-seq
14	6738197	120	+	AMELY intron	H/CH/C
15	6742407	111	+	AMELY upstream intergenic region	H/CH/C
16	9690321	120	+	intergenic	H/CH/D
17	9692907	120	+	intergenic	H/CH/D	ChIP-seq
18	9707587	120	-	intergenic	H/CH/D	Open Chromatin TFBS by ChIP-seq
19	14804758	113	+	intergenic sequences close to TTTY15	H/CH/C	Open Chromatin TFBS by ChIP-seq; ENCODE RNA-seq
20	14850277	71	-	USP9Y intron	H/CH/D	Open Chromatin TFBS by ChIP-seq
21	14965837	113	+	USP9Y intron	H/CH/C
22	15590355	115	-	UTY intron	H/CH/C	DNaseI/FAIRE/ChIP Synthesis from ENCODE/OpenChrom; Microarrays
23	19911495	109	-	intergenic	H/CH/D
24	21623147	108	+	BCORY intron	H/CH/D
25	21628254	73	-	BCORY intron	H/CH/D
26	21637337	114	+	BCORY intron	H/CH/D
27	21641906	104	+	BCORY intron	H/CH/D
28	21643641	120	+	BCORY intron	H/CH/D
29	21667548	105	-	intergenic	H/CH/D
30	21725138	112	-	intergenic	H/CH/D	ENCODE RNA-seq
31	21748991	99	-	CYorf15A intron	H/CH/C
32	21752586	110	+	intergenic between human CYorf15A and CYorf15B gene	H/CH/D	ENCODE RNA-seq; human ESTs
33	21753643	119	-	intergenic region between human CYorf15A and CYorf15B gene	H/CH/D/C	ENCODE RNA-seq; human ESTs
34	21766974	120	-	CYorf15B 3'UTR	H/CH/D/C
35	21896512	119	-	KDM5D intron	H/CH/D/C	ENCODE RNA-seq; DNaseI/FAIRE/ChIP Synthesis from ENCODE/OpenChrom; RNA Binding Protein Associated RNA by RIP-chip GeneST from ENCODE
36	21899163	117	-	KDM5D intron	H/CH/D	ENCODE RNA-seq; RNA Binding Protein Associated RNA by RIP-chip GeneST from ENCODE
37	22917853	110	+	RPS4Y2 5’UTR	H/CH/C
38	22928963	108	-	RPS4Y2 intron	H/CH/C
39	22931461	91	+	RPS4Y2 intron	H/CH/D
40	22941712	119	+	RPS4Y2 intron	H/CH/C	Open Chromatin TFBS by ChIP-seq
41	22947649	113	+	intergenic	H/CH/C
42	22970669	119	+	intergenic	H/CH/D/C	Microarrays;miRcode
43	24546723	120	+	RBMY1F intron	H/CH/D
44	24547092	120	-	RBMY1F intron	H/CH/D
45	24776302	120	+	intergenic	H/CH/D
46	25911249	120	-	intergenic	H/CH/D
47	28088961	113	+	intergenic	H/CH/C
bbrevition of species : H – humn; CH – chimpnzee; C – ct; D – dog.
